# Supplementary material for: Genome-wide association study and transcriptome analysis reveal candidate genes related to drought stress in the germination stage of soybean
Source: Front Plant Sci. 2025 Jul 30;16:1621869. doi: 10.3389/fpls.2025.1621869 (PMC12343491; doi:10.3389/fpls.2025.1621869)
Supplement: Supplementary file 2 [file Table1.xlsx]

## Sheet: Supplementary Table 1
Supplementary Table 1. The RNA quality of 18 samples
Sample name	concentration (ng/µl)	RIN value	28S/18S
DT-0-1	146	9.6	2.02
DT-0-2	170.2	9.8	1.81
DT-0-3	216.2	9.7	1.78
DT-12-1	188	9.4	1.65
DT-12-2	229.4	10	1.84
DT-12-3	134.6	10	1.89
DT-24-1	204.6	10	1.77
DT-24-2	164.9	10	1.92
DT-24-3	218.2	9.6	1.82
DS-0-1	204.1	7.4	1.99
DS-0-2	216.3	9.9	1.79
DS-0-3	238	9.8	1.77
DS-12-1	194.9	9.7	1.76
DS-12-2	173.1	9.7	1.86
DS-12-3	86.8	9.4	1.89
DS-24-1	184.4	9.8	1.6
DS-24-2	204.5	9.7	1.8
DS-24-3	139.4	9.8	1.91

## Sheet: Supplementary Table 2
Supplementary Table 2. The list of primers used for qRT-PCR
Gene ID	Forward primer (5'-3')	Reverse primer (5'-3')	PCR efficiency
Glyma.12G141700	GATTCGGGTGGTGTGGTGAA	TTCAGAGAGCACTGACGCTG	0.912
Glyma.15G040000	CACTCCTGATGACCCACGAC	TTTGCCAACTCCAAGCCTCA	1.037
Glyma.05G049300	AGAGATTGGACCTGCCATGC	GTGATGGTGCTGCAGTGATG	0.941
Glyma.14G105900	ACCCTTCTCCAACGCACTTA	ATCTGCAGGTCGTAAAGTTTGT	1.084
Glyma.15G041100	TCCTCAAACAACCATGCGGT	CACACCATGACCTCCAGTGT	0.889
GmActin11 (Glyma.18G290800)	CGGTGGTTCTATCTTGGCATC	GTCTTTCGCTTCAATAACCCTA	0.986

## Sheet: Supplementary Table 3
Supplementary Table 3. the QTLs were detected in this study for five germination-related traits
Traits	QTL	Locus	Chromosome	Position (bp)	(-log P)	R2(%)a	Referenceb
RGI	qRGI-3-1	Gm03_8803791	3	8803791	2.57506	1.41413
	qRGI-3-2	Gm03_BLOCK_19416459_19516092	3	19416459	3.24167	4.81094
	qRGI-8-1	Gm08_BLOCK_35403364_35430492	8	35403364	5.90631	7.17572
	qRGI-10-1	Gm10_2101364	10	2101364	7.8866	4.61212
	qRGI-10-2	Gm10_41840400	10	41840400	4.84858	3.42983	Drought tolerance 6-3
	qRGI-13-1	Gm13_BLOCK_37582567_37639317	13	37582567	4.0811	2.28523
	qRGI-15-1	Gm15_BLOCK_5252046_5322134	15	5252046	2.43034	3.51067
	qRGI-15-2	Gm15_BLOCK_50795137_50801641	15	50795137	3.18515	1.46532
	qRGI-16-1	Gm16_BLOCK_5188663_5273854	16	5188663	6.48486	12.6425
	qRGI-16-2	Gm16_BLOCK_15091484_15190379	16	15091484	3.26218	2.94607
	qRGI-17-1	Gm17_BLOCK_37041250_37044388	17	37041250	10.2945	24.1168	DT-GR, DT-RL (Liu et al., 2020)
	qRGI-19-1	Gm19_BLOCK_30608933_30612180	19	30608933	16.6891	15.9504
	Total					84.3597
RGP	qRGP-6-1	Gm06_5123542	6	5123542	5.9798	5.72991	RGI (Jia et al., 2024)
	qRGP-7-1	Gm07_15641101	7	15641101	2.67304	2.51126
	qRGP-8-1	Gm08_107668	8	107668	2.44266	4.02452
	qRGP-9-1	Gm09_46029960	9	46029960	4.32819	4.39226
	qRGP-13-1	Gm13_42009810	13	42009810	2.72442	2.40517
	qRGP-17-1	Gm17_BLOCK_37041250_37044388	17	37041250	23.2164	44.3551	DT-GR, DT-RL (Liu et al., 2020)
	qRGP-18-1	Gm18_29630752	18	29630752	2.16464	2.19631	WUE 1-1
	qRGP-19-1	Gm19_BLOCK_30608933_30612180	19	30608933	5.1434	5.76675
	Total					71.3813
RGR	qRGR-1-1	Gm01_BLOCK_545223_568374	1	545223	3.6648	2.84911
	qRGR-3-1	Gm03_8703011	3	8703011	4.40377	1.66364
	qRGR-6-1	Gm06_13740191	6	13740191	2.67316	2.50403	qRL-6 (Aleem et al., 2024)
	qRGR-7-1	Gm07_BLOCK_42441548_42455312	7	42441548	10.2664	11.0272	Drought index 1-6
	qRGR-9-1	Gm09_BLOCK_38940552_38970774	9	38940552	6.1399	3.12797	DT-RL (Liu et al., 2020)
	qRGR-10-1	Gm10_39242419	10	39242419	2.78393	1.36488	Drought tolerance 6-3
	qRGR-11-1	Gm11_BLOCK_11333364_11341171	11	11333364	7.82783	2.52062	Canopy wilt 4-4 Canopy wilt 4-7 Canopy wilt 5-1 mqCanopy wilt-020 DT-GR, DT-RW (Liu et al., 2020)
	qRGR-12-1	Gm12_BLOCK_18095073_18110964	12	18095073	17.5268	12.9461
	qRGR-14-1	Gm14_12621605	14	12621605	2.0287	1.10801
	qRGR-14-2	Gm14_BLOCK_13736239_13757168	14	13736239	7.80339	3.17428
	qRGR-15-1	Gm15_BLOCK_3343325_3439966	15	3343325	2.10109	19.2785
	qRGR-15-2	Gm15_34408623	15	34408623	3.77338	1.63126
	qRGR-15-3	Gm15_43079036	15	43079036	4.31003	5.11934
	qRGR-17-1	Gm17_30361627	17	30361627	5.49878	2.47273
	qRGR-18-1	Gm18_23063313	18	23063313	6.88701	6.77112	WUE 1-1
	qRGR-19-1	Gm19_39379739	19	39379739	8.66202	8.03217	mqCanopy wilt-026
	qRGR-20-1	Gm20_33986820	20	33986820	5.45469	2.7542	RGE (Jia et al., 2024); RGR, RGE, GS, GDTI, MFV (Zhao et al., 2022b)
	Total					88.3451
RSL	qRSL-1-1	Gm01_BLOCK_20888141_20978746	1	20888141	5.37353	8.79111
	qRSL-3-1	Gm03_5802356	3	5802356	12.3591	12.579
	qRSL-3-2	Gm03_13686139	3	13686139	4.0433	3.59538
	qRSL-3-3	Gm03_BLOCK_15330063_15416645	3	15330063	5.80337	7.75962
	qRSL-4-1	Gm04_BLOCK_49759584_49789208	4	49759584	8.29142	8.4461	GDTI (Zhao et al., 2022b)
	qRSL-9-1	Gm09_BLOCK_30930620_31003425	9	30930620	6.93889	9.93411	Canopy wilt 4-1
	qRSL-10-1	Gm10_BLOCK_38386826_38450905	10	38386826	3.28599	5.37774	Drought tolerance 6-3
	qRSL-14-1	Gm14_BLOCK_5120959_5144438	14	5120959	2.63736	2.31239	Canopy wilt 1-2 Canopy wilt 3-7 DT-GR ( Liu et al., 2020)
	qRSL-14-2	Gm14_BLOCK_48207540_48252941	14	48207540	5.74083	9.47378	GDTI (Zhao et al., 2022b)
	qRSL-15-1	Gm15_BLOCK_28376542_28382928	15	28376542	3.3145	4.16093
	qRSL-15-2	Gm15_BLOCK_48045223_48102453	15	48045223	3.63524	3.4592	GSI (Zhao et al., 2022b)
	qRSL-18-1	Gm18_BLOCK_34173116_34205783	18	34173116	2.85713	2.63706	WUE 1-1
	qRSL-19-1	Gm19_BLOCK_49940452_49947937	19	49940452	6.75114	6.39914	Canopy wilt 6-2 GDTI (Zhao et al., 2022b); DT-GR (Liu et al., 2020)
	Total					84.9256
RSFW	qRSFW-1-1	Gm01_BLOCK_37243385_37343176	1	37243385	3.86062	3.39421	RGR, RGE, GDTI, MFV (Zhao et al., 2022b)
	qRSFW-4-1	Gm04_BLOCK_3759289_3858914	4	3759289	2.47281	2.99023	Canopy wilt 3-9
	qRSFW-5-1	Gm05_4278211	5	4278211	13.4507	40.6282	Canopy wilt 2-3 Canopy wilt 3-1 Drought tolerance 6-2
	qRSFW-7-1	Gm07_BLOCK_24048954_24129807	7	24048954	5.56984	6.74049	GDTI (Zhao et al., 2022b)
	qRSFW-11-1	Gm11_9879125	11	9879125	3.15759	3.96676	Canopy wilt 4-7
	qRSFW-14-1	Gm14_BLOCK_11032873_11132669	14	11032873	7.00999	10.3807
	qRSFW-17-1	Gm17_BLOCK_6349604_6445713	17	6349604	4.87066	5.23981	Drought index 1-9
	qRSFW-19-1	Gm19_1441231	19	1441231	3.34694	4.87899
	Total					78.2194
a Loci with a higher phenotype variation (R2＞10%) were highlight by bold font; b the physical location overlaps with the reported QTL at Soybase (https://legacy.soybase.org/). Aleem, M., Razzaq, M.K., Aleem, M., Yan, W., Sharif, I., Siddiqui, M.H., et al. (2024). Genome-wide association study provides new insight into the underlying mechanism of drought tolerance during seed germination stage in …

## Sheet: Supplementary Table 4
Supplementary Table 4. RNA sequencing data and corresponding quality control
Sample	Total Reads	Mapped Reads	Unique Mapped Reads	GC(%)	Q20(%)	Q30(%)
DS-0-1	58015148	53,442,482 (92.12%)	52,285,350 (90.12%)	44.62	98.13	94.98
DS-0-2	43047384	39,372,903 (91.46%)	38,567,921 (89.59%)	44.81	98.23	95.15
DS-0-3	44055972	40,699,054 (92.38%)	39,835,256 (90.42%)	44.85	98.36	95.48
DS-12-1	58989710	54,207,132 (91.89%)	53,070,851 (89.97%)	44.43	97.96	94.42
DS-12-2	56882296	52,648,097 (92.56%)	51,584,432 (90.69%)	44.62	98.23	95.18
DS-12-3	57024114	53,391,930 (93.63%)	52,246,363 (91.62%)	44.3	98.21	95.1
DS-24-1	58353276	54,282,879 (93.02%)	53,140,902 (91.07%)	44.15	98.21	95.09
DS-24-2	42949082	39,945,801 (93.01%)	39,073,159 (90.98%)	44.46	98.56	95.91
DS-24-3	59432138	55,014,894 (92.57%)	53,838,240 (90.59%)	44.37	98.23	95.17
DT-0-1	45199302	41,716,549 (92.29%)	40,831,326 (90.34%)	44.6	98.48	95.79
DT-0-2	44172138	41,112,707 (93.07%)	40,260,976 (91.15%)	44.67	98.44	95.72
DT-0-3	59841474	54,194,646 (90.56%)	53,024,289 (88.61%)	44.78	98.08	94.82
DT-12-1	46254940	42,991,119 (92.94%)	42,148,370 (91.12%)	44.39	98.45	95.75
DT-12-2	42658880	39,386,538 (92.33%)	38,643,864 (90.59%)	44.63	98.36	95.49
DT-12-3	55781526	50,870,479 (91.20%)	49,749,027 (89.19%)	44.52	97.97	94.52
DT-24-1	45178258	42,299,321 (93.63%)	41,458,229 (91.77%)	44.41	98.51	95.87
DT-24-2	58539616	54,391,469 (92.91%)	53,185,209 (90.85%)	44.38	98.14	94.91
DT-24-3	45485010	42,375,265 (93.16%)	41,457,546 (91.15%)	44.29	98.39	95.49

## Sheet: Supplementary Table 5
Supplementary Table 5. Details of DEGs in the phenylpropanoid biosynthesis pathway
TimeTreatment	Gene Name	GO ID	GO Description	KEGG ID	KEGG Description
12h	Glyma.08G216200	GO:0003854	3-beta-hydroxy-delta5-steroid dehydrogenase activity
	Glyma.20G128600	GO:0005488	binding	K00083	cinnamyl-alcohol dehydrogenase [EC:1.1.1.195]
	Glyma.08G039300	GO:0008152	metabolic process	K12355	coniferyl-aldehyde dehydrogenase [EC:1.2.1.68]
	Glyma.13G095600	GO:0003824	catalytic activity
	Glyma.04G113400	GO:0003824	catalytic activity
	Glyma.05G125800	GO:0003824	catalytic activity
	Glyma.08G150100	GO:0003824	catalytic activity	K01188	beta-glucosidase [EC:3.2.1.21]
	Glyma.18G065400	GO:0004553	hydrolase activity, hydrolyzing O-glycosyl compounds
	Glyma.05G124000	GO:0005515	protein binding
	Glyma.09G281800	GO:0008168	methyltransferase activity	K13066	caffeic acid 3-O-methyltransferase [EC:2.1.1.68]
	Glyma.07G048700	GO:0008168	methyltransferase activity
	Glyma.07G048800	GO:0008168	methyltransferase activity	K13066	caffeic acid 3-O-methyltransferase [EC:2.1.1.68]
	Glyma.05G147000	GO:0008171	O-methyltransferase activity	K00588	caffeoyl-CoA O-methyltransferase [EC:2.1.1.104]
	Glyma.17G177800	GO:0004601	peroxidase activity	K00430	peroxidase [EC:1.11.1.7]
	Glyma.09G022300	GO:0004601	peroxidase activity	K00430	peroxidase [EC:1.11.1.7]
	Glyma.09G277800	GO:0004601	peroxidase activity	K00430	peroxidase [EC:1.11.1.7]
	Glyma.09G022500	GO:0004601	peroxidase activity	K00430	peroxidase [EC:1.11.1.7]
	Glyma.07G209900	GO:0004601	peroxidase activity	K00430	peroxidase [EC:1.11.1.7]
	Glyma.02G171600	GO:0004601	peroxidase activity	K00430	peroxidase [EC:1.11.1.7]
	Glyma.02G127300	GO:0004601	peroxidase activity	K00430	peroxidase [EC:1.11.1.7]
	Glyma.03G039700	GO:0004601	peroxidase activity	K00430	peroxidase [EC:1.11.1.7]
	Glyma.14G053600	GO:0004601	peroxidase activity	K00430	peroxidase [EC:1.11.1.7]
	Glyma.08G179600	GO:0004601	peroxidase activity	K00430	peroxidase [EC:1.11.1.7]
	Glyma.01G200400	GO:0004601	peroxidase activity	K00430	peroxidase [EC:1.11.1.7]
	Glyma.01G070200	GO:0004601	peroxidase activity	K00430	peroxidase [EC:1.11.1.7]
	Glyma.05G144600	GO:0016747	transferase activity, transferring acyl groups other than amino-acyl groups
	Glyma.18G104000	GO:0016747	transferase activity, transferring acyl groups other than amino-acyl groups	K13065	shikimate O-hydroxycinnamoyltransferase [EC:2.3.1.133]
	Glyma.07G254700	GO:0008152	metabolic process
	Glyma.07G254600	GO:0008152	metabolic process
	Glyma.07G254900	GO:0008152	metabolic process
	Glyma.03G032500	GO:0008152	metabolic process
	Glyma.06G206700	GO:0008152	metabolic process
24h	Glyma.01G017100	GO:0003824	catalytic activity
	Glyma.08G216200	GO:0003854	3-beta-hydroxy-delta5-steroid dehydrogenase activity
	Glyma.09G205700	GO:0003854	3-beta-hydroxy-delta5-steroid dehydrogenase activity
	Glyma.14G221200	GO:0005488	binding	K00083	cinnamyl-alcohol dehydrogenase [EC:1.1.1.195]
	Glyma.08G039300	GO:0008152	metabolic process	K12355	coniferyl-aldehyde dehydrogenase [EC:1.2.1.68]
	Glyma.01G232400	GO:0003824	catalytic activity	K01904	4-coumarate--CoA ligase [EC:6.2.1.12]
	Glyma.11G010500	GO:0003824	catalytic activity	K01904	4-coumarate--CoA ligase [EC:6.2.1.12]
	Glyma.12G079600	GO:0003824	catalytic activity
	Glyma.04G113400	GO:0003824	catalytic activity
	Glyma.11G129700	GO:0003824	catalytic activity	K01188	beta-glucosidase [EC:3.2.1.21]
	Glyma.14G045000	GO:0004553	hydrolase activity, hydrolyzing O-glycosyl compounds	K01188	beta-glucosidase [EC:3.2.1.21]
	Glyma.18G065400	GO:0004553	hydrolase activity, hydrolyzing O-glycosyl compounds
	Glyma.17G058300
	Glyma.07G048700	GO:0008168	methyltransferase activity
	Glyma.01G004200	GO:0008171	O-methyltransferase activity	K00588	caffeoyl-CoA O-methyltransferase [EC:2.1.1.104]
	Glyma.10G058200	GO:0003824	catalytic activity	K10775	phenylalanine ammonia-lyase [EC:4.3.1.24]
	Glyma.01G130800	GO:0004601	peroxidase activity	K00430	peroxidase [EC:1.11.1.7]
	Glyma.01G163100	GO:0004601	peroxidase activity	K00430	peroxidase [EC:1.11.1.7]
	Glyma.02G171600	GO:0004601	peroxidase activity	K00430	peroxidase [EC:1.11.1.7]
	Glyma.03G038300	GO:0004601	peroxidase activity	K00430	peroxidase [EC:1.11.1.7]
	Glyma.03G039700	GO:0004601	peroxidase activity	K00430	peroxidase [EC:1.11.1.7]
	Glyma.04G227200	GO:0004601	peroxidase activity	K00430	peroxidase [EC:1.11.1.7]
	Glyma.06G145300	GO:0004601	peroxidase activity	K00430	peroxidase [EC:1.11.1.7]
	Glyma.08G179600	GO:0004601	peroxidase activity	K00430	peroxidase [EC:1.11.1.7]
	Glyma.08G179700	GO:0004601	peroxidase activity	K00430	peroxidase [EC:1.11.1.7]
	Glyma.11G080300	GO:0004601	peroxidase activity	K00430	peroxidase [EC:1.11.1.7]
	Glyma.12G195500	GO:0004601	peroxidase activity	K00430	peroxidase [EC:1.11.1.7]
	Glyma.13G138300	GO:0004601	peroxidase activity	K00430	peroxidase [EC:1.11.1.7]
	Glyma.13G172300	GO:0004601	peroxidase activity	K00430	peroxidase [EC:1.11.1.7]
	Glyma.14G201600	GO:0004601	peroxidase activity	K00430	peroxidase [EC:1.11.1.7]
	Glyma.15G052700	GO:0004601	peroxidase activity	K00430	peroxidase [EC:1.11.1.7]
	Glyma.15G128800	GO:0004601	peroxidase activity	K00430	peroxidase [EC:1.11.1.7]
	Glyma.15G163500	GO:0004601	peroxidase activity	K00430	peroxidase [EC:1.11.1.7]
	Glyma.16G164200	GO:0004601	peroxidase activity	K00430	peroxidase [EC:1.11.1.7]
	Glyma.18G055600	GO:0004601	peroxidase activity	K00430	peroxidase [EC:1.11.1.7]
	Glyma.03G032500	GO:0008152	metabolic process
	Glyma.06G206700	GO:0008152	metabolic process
	Glyma.07G254600	GO:0008152	metabolic process
	Glyma.07G254700	GO:0008152	metabolic process
	Glyma.07G254800	GO:0008152	metabolic process
	Glyma.07G254900	GO:0008152	metabolic process
	Glyma.14G043600	GO:0008152	metabolic process

## Sheet: Supplementary Table 6
Supplementary Table 6. Candidate hub genes in four modules according to kME value
Gene ID	kME value	Module	Annotation Description
Glyma.17G034700	0.999091	darkolivegreen	pleiotropic drug resistance 9 (ATP-BINDING CASSETTE G37)
Glyma.15G033500	0.998615	darkolivegreen	ZIP metal ion transporter family
Glyma.17G135000	0.998358	darkolivegreen	Leucine-rich repeat protein kinase family protein
Glyma.06G047400	0.996605	darkolivegreen	serine-type carboxypeptidase activity
Glyma.17G230700	0.995236	darkolivegreen	gamma vacuolar processing enzyme
Glyma.10G021400	0.993171	darkolivegreen	B-box type zinc finger protein with CCT domain
Glyma.05G226700	0.992683	darkolivegreen	NAD-binding of NADP-dependent 3-hydroxyisobutyrate dehydrogenase
Glyma.13G229300	0.9915	darkolivegreen	abscisic acid receptor PYL11-related protein (PYL6,RCAR9)
Glyma.08G130600	0.991159	darkolivegreen	Cellulase (glycosyl hydrolase family 5) protein
Glyma.17G039300	0.990674	darkolivegreen	pleiotropic drug resistance 9 (ATP-BINDING CASSETTE G37)
Glyma.08G188300	0.990364	darkolivegreen	SNF1-related protein kinase 2.10 (SnRK2s)
Glyma.12G178500	0.988931	darkolivegreen	FER-like regulator of iron uptake (BHLH029)
Glyma.17G051400	0.987776	darkolivegreen	nuclear factor Y, subunit A8 (NF-YA8)
Glyma.07G048800	0.987539	darkolivegreen	O-methyltransferase 1(ATOMT1)
Glyma.06G167600	0.987265	darkolivegreen	HXXXD-type acyl-transferase family protein
Glyma.16G181200	0.987068	darkolivegreen	NAD(P)-binding Rossmann-fold superfamily protein
Glyma.13G103100	0.986959	darkolivegreen	xyloglucan endotransglycosylase 6 (XTH23)
Glyma.13G056600	0.986526	darkolivegreen	UDP-Glycosyltransferase superfamily protein
Glyma.03G216300	0.986079	darkolivegreen	sucrose metabolic process
Glyma.07G051000	0.984676	darkolivegreen	CBL-interacting protein kinase 9
Glyma.18G197800	0.983966	darkolivegreen	glycerol-3-phosphate acyltransferase 6 (ATGPAT6)
Glyma.06G269500	0.98385	darkolivegreen	Translation initiation factor SUI1 family protein
Glyma.01G165000	0.982898	darkolivegreen	Glycosyl hydrolase family 38 protein
Glyma.17G003200	0.982295	darkolivegreen	glutathione S-transferase zeta 1
Glyma.03G066700	0.981695	darkolivegreen	NAD(P)-linked oxidoreductase superfamily protein
Glyma.07G272600	0.981357	darkolivegreen	Major facilitator superfamily protein (NPF4.3)
Glyma.07G140800	0.980226	darkolivegreen	Universal stress protein family
Glyma.03G066600	0.980219	darkolivegreen	NAD(P)-linked oxidoreductase superfamily protein
Glyma.03G082100	0.990807	mediumorchid	metal ion binding（MT2A）
Glyma.04G231400	0.986248	mediumorchid	DNA-binding transcription factor activity（ATHB-7）
Glyma.09G052800	0.983791	mediumorchid	Ethylene-responsive factor gene 69 (ERF69)
Glyma.09G055700	0.994983	paleturquoise	Protein kinase superfamily protein
Glyma.06G271200	0.99486	paleturquoise	ion transport（ATCNGC4）
Glyma.18G009800	0.982881	paleturquoise	G-BOX BINDING PROTEIN
Glyma.12G091200	0.982429	paleturquoise	NAC Transcription Factor gene 82 (NAC082)
Glyma.13G124900	0.99027	skyblue2	GRAS domain family（SGR1）
Glyma.13G186500	0.989398	skyblue2	transmembrane transport（ZIFL1）
Glyma.13G135500	0.987651	skyblue2	glutathione S-transferase L3
Glyma.13G274000	0.986032	skyblue2	Yippee zinc-binding/DNA-binding /Mis18, centromere assembly
Glyma.07G140000	0.983676	skyblue2	glutathione transferase（ATGSTU8）

## Sheet: Supplementary Table 7
Supplementary Table 7. Genes located in the 10 large-contribution QTLs
Loci	Gene Name	PFAM ID	PFAM Description	GO ID	GO Description	The value of FPKM
						DS-0	DS-12	DS-24	DT-0	DT-12	DT-24
qRSL-3-1	Glyma.03G044300	PF03018	Dirigent			27.0497	35.4632	32.0948	22.5853	26.6156	42.1694
	Glyma.03G044400	PF03018	Dirigent			11.9294	1.35703	3.11508	32.3752	8.25035	3.06717
	Glyma.03G044500	PF03018	Dirigent			988.824	256.456	259.109	1252.07	494.769	248.166
	Glyma.03G044600					0	0	0	2.69051	0.231834	0
	Glyma.03G044700					0	0	0	0	0	0
	Glyma.03G044800	PF05699	hATC	GO:0003676	nucleic acid binding	0	0	0	0	0	0
	Glyma.03G044900	PF03018	Dirigent			7.15831	48.1528	26.5903	15.4144	161.475	62.172
	Glyma.03G045000					1.62765	1.21197	1.5312	1.13596	0.994905	1.26169
	Glyma.03G045100					2.38691	1.51911	1.88792	0.360824	0.419042	0.83306
	Glyma.03G045200	PF00481	PP2C	GO:0003824	catalytic activity	0.589348	0.692234	0.542159	0	0	0
	Glyma.03G045300	PF00931	NB-ARC	GO:0005524	ATP binding	2.35618	1.50593	2.026	7.23884	5.45036	6.41068
	Glyma.03G045400	PF08241	Methyltransf_11	GO:0008152	metabolic process	18.7729	15.0247	12.8286	21.2429	17.5563	12.4748
	Glyma.03G045500					7.29413	6.29968	8.41749	6.02747	5.69428	5.3118
	Glyma.03G045600	PF03018	Dirigent			69.9823	56.7237	71.4798	78.5242	37.595	41.5836
	Glyma.03G045700	PF00931	NB-ARC	GO:0005515	protein binding	0.789957	0.513015	1.19318	0.408982	0.201523	1.16159
	Glyma.03G045800	PF03018	Dirigent			0	0	0	0	0	0
	Glyma.03G045900					0	0.0243163	0	0.682307	0	0.023772
	Glyma.03G046000	PF03018	Dirigent			56.3087	16.972	21.7391	74.795	19.5422	19.5778
	Glyma.03G046100	PF02880	PGM_PMM_III	GO:0005975	carbohydrate metabolic process	0	0	0	0	0	0
	Glyma.03G046200	PF01187	MIF			30.1313	30.2699	39.4294	20.8876	33.0075	52.5023
	Glyma.03G046300	PF01187	MIF			121.126	95.8784	178.17	112.25	93.2189	179.191
	Glyma.03G046400	PF03208	PRA1			96.3941	73.1643	54.2145	85.2457	76.426	52.1556
	Glyma.03G046500	PF00931	NB-ARC	GO:0005524	ATP binding	2.32535	1.76431	2.47311	1.8959	1.45532	1.89758
	Glyma.03G046600					8.97486	6.00908	9.53304	12.766	10.4363	17.4939
	Glyma.03G046700					0.0172897	0.0356087	0	12.26	10.9432	13.7081
	Glyma.03G046800			GO:0003824	catalytic activity	0	0	0	15.8898	16.57	24.2477
	Glyma.03G046900	PF07714	Pkinase_Tyr	GO:0004672	protein kinase activity	0	0.0272317	0	0	0	0
	Glyma.03G047000	PF13191	AAA_16	GO:0005524	ATP binding	1.95882	1.33717	1.85826	1.47622	0.862875	1.14398
	Glyma.03G047100	PF08263	LRRNT_2	GO:0004672	protein kinase activity	3.68443	0.629856	1.75737	2.4539	0.261403	0.798853
	Glyma.03G047200					9.346	7.00952	8.72032	7.77003	7.33385	7.43444
	Glyma.03G047300					0.927352	0.0888497	0.381698	0.396286	0.225186	0.0669333
	Glyma.03G047400	PF07727	RVT_2	GO:0005515	protein binding	0	0	0	0	0	0.017771
qRGI-16-1	Glyma.16G213300	PF02516	STT3	GO:0004576	oligosaccharyl transferase activity	29.645	17.2175	21.4238	30.9449	19.6456	21.2091
	Glyma.16G213400			GO:0016998	cell wall macromolecule catabolic process	19.8913	8.29581	8.22811	21.6071	9.51151	8.20997
	Glyma.16G212900	PF03169	OPT	GO:0055085	transmembrane transport	57.8414	26.0622	47.5476	53.0992	49.1898	66.3825
	Glyma.16G213700	PF00931	NB-ARC	GO:0000166	nucleotide binding	22.0476	15.3829	27.0492	26.8901	21.2226	28.7899
	Glyma.16G209800	PF16499	Melibiase_2	GO:0003824	catalytic activity	2.32869	3.03454	1.38692	1.97113	1.88072	0.712924
	Glyma.16G210800	PF00931	NB-ARC	GO:0000166	nucleotide binding	0.859012	0.448253	1.66854	1.69675	1.00882	1.42159
	Glyma.16G212100	PF00197	Kunitz_legume	GO:0004866	endopeptidase inhibitor activity	0	0.0557323	1.47452	0	0.0911503	0.708697
	Glyma.16G210300	PF00067	p450	GO:0004497	monooxygenase activity	1.94537	1.11286	0.472656	1.87516	1.92594	0.391992
	Glyma.16G211500					2.248	3.17558	4.35469	2.77483	3.4268	4.78587
	Glyma.16G213500	PF13639	zf-RING_2	GO:0005515	protein binding	13.3976	14.1624	12.4407	11.2162	14.0708	10.6271
	Glyma.16G214300	PF04450	BSP	GO:0000166	nucleotide binding	0.0353693	0.059218	0.20428	0.150759	0.240411	0.799371
	Glyma.16G210200					3.24778	2.76702	3.7374	3.1298	3.28949	2.81057
	Glyma.16G214100	PF00931	NB-ARC	GO:0004888	transmembrane signaling receptor activity	2.65733	3.41985	5.49883	3.00137	3.67355	5.92168
	Glyma.16G211400	PF00004	AAA	GO:0000166	nucleotide binding	3.96485	4.28514	5.44809	4.73023	5.30925	6.40881
	Glyma.16G209500	PF05623	DUF789			0.436986	0.105248	0.212603	0.305804	0.185341	0
	Glyma.16G214000	PF00931	NB-ARC	GO:0004888	transmembrane signaling receptor activity	5.57274	3.96928	6.85839	4.88222	3.87252	5.82484
	Glyma.16G209900	PF00149	Metallophos	GO:0016787	hydrolase activity	1.84877	2.25145	2.11208	1.36418	2.02485	1.8778
	Glyma.16G212700	PF03604	DNA_RNApol_7kD	GO:0003677	DNA binding	96.1834	95.2989	140.147	89.6647	98.6114	126.98
	Glyma.16G209100	PF03140	DUF247			0	0	0	0.00878167	0	0
	Glyma.16G214400	PF03081	Exo70	GO:0000145	exocyst	0.0900463	0.112625	0.146378	0.0169973	0.0502167	0.049982
	Glyma.16G209000	PF13676	TIR_2	GO:0004888	transmembrane signaling receptor activity	0.613088	0.756451	1.20789	0.526371	0.667154	1.70839
	Glyma.16G211700	PF00197	Kunitz_legume	GO:0004866	endopeptidase inhibitor activity	368.596	67.4337	85.3478	261.13	22.5139	47.6757
	Glyma.16G210700	PF10294	Methyltransf_16			1.4646	1.55292	1.98837	1.97033	3.09248	2.71951
	Glyma.16G210900	PF07000	DUF1308			4.01628	4.15288	4.51801	3.42831	3.50777	4.33204
	Glyma.16G210100	PF08263	LRRNT_2	GO:0004672	protein kinase activity	0.511224	1.29646	0.825316	0.739302	1.08734	0.520852
	Glyma.16G210600	PF00931	NB-ARC	GO:0000166	nucleotide binding	16.9006	11.4388	15.3603	24.5021	15.5081	14.3588
	Glyma.16G212200	PF00197	Kunitz_legume	GO:0004866	endopeptidase inhibitor activity	0	0	0.666193	0.108643	0	0.446543
	Glyma.16G213900	PF05729	NACHT	GO:0004888	transmembrane signaling receptor activity	3.18884	2.47645	3.34625	2.68766	1.98062	3.32385
	Glyma.16G211000	PF00931	NB-ARC	GO:0005524	ATP binding	0	0.006983	0	0	0	0.0877133
	Glyma.16G209200					0	0	0	0	0	0
	Glyma.16G209400	PF00005	ABC_tran	GO:0000166	nucleotide binding	0.155004	0.0458307	0.00525933	0.201973	0.00677567	0
	Glyma.16G214200	PF04450	BSP	GO:0000166	nucleotide binding	0.0393347	0	0	0.0125327	0.021868	0.065939
	Glyma.16G211300	PF08839	CDT1			2.74966	1.30967	3.48161	3.10974	1.37744	2.50185
	Glyma.16G212300	PF00931	NB-ARC	GO:0000166	nucleotide binding	0.0126413	0.029499	0.0434753	0.0362487	0.0829413	0.0578843
	Glyma.16G212600	PF02893	GRAM			13.3089	11.4795	13.927	20.3011	17.0897	15.9213
	Glyma.16G212800	PF05623	DUF789			6.10125	5.84685	6.96724	7.74763	5.3808	6.30424
	Glyma.16G214500	PF13499	EF-hand_7	GO:0004888	transmembrane signaling receptor activity	58.102	37.2503	55.8215	65.636	50.0758	56.7988
	Glyma.16G214700	PF01582	TIR	GO:0004888	transmembrane signaling receptor activity	0	0.0403227	0	0.15146	0	0.058944
	Glyma.16G209700	PF01535	PPR	GO:0005488	binding	0.655159	0.351959	0.231409	0.287681	0.2825	0.187816
	Glyma.16G209600					6.14822	5.47376	6.5083	6.46006	6.86374	6.68331
	Glyma.16G209300	PF16113	ECH_2	GO:0003824	catalytic activity	0.362086	0.163503	0	0.0920893	0	0.0797893
	Glyma.16G214600	PF00931	NB-ARC	GO:0004888	transmembrane signaling receptor activity	1.44523	1.23154	2.24339	1.7575	1.1796	2.19153
	Glyma.16G212400	PF00197	Kunitz_legume	GO:0004866	endopeptidase inhibitor activity	26.2392	119.224	240.171	19.1747	147.822	181.537
	Glyma.16G212500	PF00197	Kunitz_legume	GO:0004866	endopeptidase inhibitor activity	4.13424	16.0079	4.62295	3.20811	9.98162	7.78259
	Glyma.16G213100	PF13355	DUF4101			2.48103	1.97475	2.02327	2.76576	2.3919	1.694
	Glyma.16G213600					1.17196	1.91222	2.59618	2.34255	2.22995	1.30577
	Glyma.16G210400					8.22293	12.6929	10.902	7.0659	12.7789	9.10561
	Glyma.16G211900	PF01535	PPR	GO:0005488	binding	0.274663	0.159955	0.270474	0.480819	0.225777	0.257406
	Glyma.16G211600	PF02892	zf-BED	GO:0003677	DNA binding	4.25739	3.79455	4.34467	4.87625	3.31902	4.15411
	Glyma.16G211200					2.28587	2.25527	3.82173	2.44471	2.7889	3.98428
	Glyma.16G210500	PF08263	LRRNT_2	GO:0004672	protein kinase activity	3.64468	6.55644	7.08567	3.42711	7.8175	9.27811
	Glyma.16G213000					5.5593	2.58132	4.29384	6.04572	3.10425	3.13151
	Glyma.16G211800	PF00197	Kunitz_legume	GO:0004866	endopeptidase inhibitor activity	22.6658	9.60826	14.1118	12.6759	7.29199	14.2408
	Glyma.16G213200	PF00549	Ligase_CoA	GO:0003824	catalytic activity	59.3665	68.8159	59.4655	63.9179	66.3696	53.8225
	Glyma.16G210000	PF00230	MIP	GO:0005215	transporter activity	0	0	0	0	0	0
	Glyma.16G213800	PF00931	NB-ARC	GO:0004888	transmembrane signaling receptor activity	0	0	0.0164393	0.0100947	0.026694	0.069695
	Glyma.16G214800	PF13499	EF-hand_7	GO:0004888	transmembrane signaling receptor activity	35.8652	20.0034	29.4518	46.061	29.4781	28.216
	Glyma.16G211100	PF03097	BRO1			7.13343	3.31628	3.74354	5.30976	2.73369	3.14695
	Glyma.16G212000	PF00201	UDPGT	GO:0008152	metabolic process	0.0112483	0.120957	0.0344237	0.0933257	0.0531887	0.00352667
qRSFW-5-1	Glyma.05G047500	PF10172	DDA1			23.8413	21.3787	25.9413	22.0737	19.9934	27.9006
	Glyma.05G049400	PF14299	PP2	GO:0005515	protein binding	5.93924	7.03208	6.35946	5.52612	7.52435	6.40217
	Glyma.05G046700	PF00764	Arginosuc_synth	GO:0004055	argininosuccinate synthase activity	24.0848	12.9074	15.4575	20.7449	11.6867	12.6714
	Glyma.05G045900	PF01274	Malate_synthase	GO:0003824	catalytic activity	51.6731	32.9719	70.0204	49.0848	38.3645	68.4373
	Glyma.05G047900	PF00149	Metallophos	GO:0003993	acid phosphatase activity	20.2168	7.65259	15.5124	20.2411	8.01922	12.9172
	Glyma.05G048200	PF00899	ThiF	GO:0003824	catalytic activity	32.14	26.4704	26.1062	33.4441	29.1552	27.256
	Glyma.05G048500					0.727659	1.07299	0.634577	0.310001	0.653664	0.297268
	Glyma.05G048900	PF00004	AAA	GO:0000166	nucleotide binding	11.5537	10.0412	10.1289	12.5352	12.6843	10.6321
	Glyma.05G047800	PF03081	Exo70	GO:0000145	exocyst	12.9177	19.9539	17.6401	13.3497	20.027	18.1827
	Glyma.05G048700			GO:0003824	catalytic activity	35.2828	22.3587	31.5832	34.7445	24.8064	28.3539
	Glyma.05G049200	PF00789	UBX	GO:0005515	protein binding	23.9598	32.2494	23.6787	24.5511	33.0764	21.5007
	Glyma.05G047200	PF14681	UPRTase			0	0	0	0	0	0
	Glyma.05G049100	PF06728	PIG-U	GO:0005789	endoplasmic reticulum membrane	4.30179	3.01994	3.84225	6.61185	4.58012	5.01606
	Glyma.05G046400	PF08156	NOP5NT			65.0408	58.2291	49.7913	59.6652	52.8475	51.7462
	Glyma.05G047600	PF02201	SWIB	GO:0005515	protein binding	3.06353	4.38207	3.24153	3.2241	3.33728	2.48796
	Glyma.05G049700	PF01554	MatE	GO:0006855	drug transmembrane transport	0	0.103668	0.0672667	0	0.147555	0.0321837
	Glyma.05G047400	PF00498	FHA	GO:0000166	nucleotide binding	17.2914	21.1492	19.478	18.1757	21.9444	17.9864
	Glyma.05G047700	PF00571	CBS	GO:0003824	catalytic activity	16.6738	25.1926	26.5287	12.2506	25.6717	31.0522
	Glyma.05G047100	PF13202	EF-hand_5	GO:0005509	calcium ion binding	1.48387	3.30629	0.630794	2.44314	1.17841	0.292824
	Glyma.05G048000	PF00213	OSCP	GO:0005886	plasma membrane	3.73495	5.59135	4.62311	1.80491	5.2589	5.82205
	Glyma.05G048600	PF04669	DUF579			1.62114	0.87039	0.599575	1.81318	1.14795	0.361782
	Glyma.05G049500	PF03062	MBOAT			15.9147	14.8342	15.7222	13.3838	11.9767	14.0881
	Glyma.05G046300	PF00406	ADK	GO:0004017	adenylate kinase activity	46.9753	45.4929	40.8191	49.6789	43.6399	38.6939
	Glyma.05G046900	PF00764	Arginosuc_synth	GO:0004055	argininosuccinate synthase activity	9.21969	2.06427	2.31131	8.11162	1.35341	1.35274
	Glyma.05G047000	PF08387	FBD			0.0357433	0.0119397	0.011898	0.0151577	0	0
	Glyma.05G047300	PF12022	DUF3510	GO:0005089	Rho guanyl-nucleotide exchange factor activity	9.03159	7.0318	5.11714	9.89946	7.54563	4.38074
	Glyma.05G048300					0.965819	0.196247	0.824072	1.26973	0.247343	0.540452
	Glyma.05G046000	PF00069	Pkinase	GO:0004672	protein kinase activity	99.5793	105.606	121.788	104.01	117.685	137.902
	Glyma.05G049300	PF03514	GRAS			7.32246	1.25512	4.87232	7.66204	1.11518	2.81306
	Glyma.05G046100	PF00406	ADK	GO:0004017	adenylate kinase activity	37.1025	33.3402	30.1674	40.3495	31.0051	27.185
	Glyma.05G046600	PF00400	WD40	GO:0005515	protein binding	0	0	0	0	0	0
	Glyma.05G046800					0.007344	0	0	0	0	0
	Glyma.05G049000	PF00612	IQ	GO:0005515	protein binding	0.70326	1.15105	0.602295	0.331275	1.13673	0.415444
	Glyma.05G045800					0	0.192061	0	0	0	0
	Glyma.05G046500	PF04827	Plant_tran	GO:0016788	hydrolase activity, acting on ester bonds	0	0	0	0	0	0
	Glyma.05G048400	PF00383	dCMP_cyt_deam_1	GO:0003824	catalytic activity	5.48372	1.21924	1.90326	3.90514	1.44722	1.94128
	Glyma.05G049800	PF00847	AP2	GO:0003677	DNA binding	0.36411	0.238835	0.091588	0.39931	0.103086	0.022575
	Glyma.05G046200	PF00069	Pkinase	GO:0004672	protein kinase activity	0.0530743	0.431575	0.0529397	0.0346067	0.057361	0.0936177
	Glyma.05G049900	PF00847	AP2	GO:0003677	DNA binding	0.055617	0.0995463	0.0695033	0.155977	0.0417683	0.0469437
	Glyma.05G049600	PF02179	BAG	GO:0005515	protein binding	2.85806	3.97589	2.51307	3.07053	3.23123	1.99886
	Glyma.05G048800	PF13639	zf-RING_2	GO:0005515	protein binding	27.5156	31.9817	25.8657	28.2665	44.5739	27.854
	Glyma.05G050000					2.1015	0.131896	0.585033	1.77829	0.740122	0.18497
	Glyma.05G048100					0.119118	0.0603683	0.250442	0	0.0630457	0.104517
qRGR-7-1	Glyma.07G243500	PF00407	Bet_v_1	GO:0006952	defense response	166.045	727.903	1588.37	192.192	957.607	1227.31
	Glyma.07G247300	PF05185	PRMT5	GO:0005737	cytoplasm	8.6004	8.38536	7.5122	9.99536	8.58956	8.33409
	Glyma.07G243900	PF00407	Bet_v_1	GO:0006952	defense response	7.36316	37.9169	82.0787	19.439	47.0443	63.0843
	Glyma.07G247900	PF01411	tRNA-synt_2c	GO:0000166	nucleotide binding	25.0598	35.1857	60.0848	25.7862	29.9833	56.5762
	Glyma.07G242900	PF00514	Arm	GO:0005488	binding	12.6059	2.98335	6.87578	11.0269	2.86468	4.19749
	Glyma.07G247200					2.37663	1.83387	2.31673	2.45769	2.41417	2.55866
	Glyma.07G243000	PF00320	GATA	GO:0003700	transcription factor activity, sequence-specific DNA binding	22.1	12.0377	15.4499	16.6001	13.4699	12.4474
	Glyma.07G245400	PF13639	zf-RING_2	GO:0005515	protein binding	0.0841487	0.101614	0.0553717	0.0138433	0.100081	0.0245183
	Glyma.07G243600	PF00407	Bet_v_1	GO:0006952	defense response	723.024	910.351	705.39	735.882	865.97	472.364
	Glyma.07G244900	PF13414	TPR_11	GO:0005488	binding	13.7317	19.1498	12.4451	15.8844	17.22	10.8605
	Glyma.07G243800					0	0	0	0	0	0
	Glyma.07G245000					31.9491	25.4481	38.3622	31.2543	23.3038	35.9785
	Glyma.07G244000	PF00403	HMA	GO:0030001	metal ion transport	2.39525	1.86806	2.17611	1.96181	1.67562	1.14437
	Glyma.07G245100	PF12708	Pectate_lyase_3	GO:0004650	polygalacturonase activity	0	0	0	0	0	0
	Glyma.07G245700	PF00152	tRNA-synt_2	GO:0000166	nucleotide binding	3.63279	4.22599	5.32451	3.51093	3.96919	4.60284
	Glyma.07G245500	PF01535	PPR	GO:0005488	binding	0.696049	0.493201	1.25882	0.633894	0.632645	1.00136
	Glyma.07G247100	PF00651	BTB	GO:0005515	protein binding	7.07372	8.04683	7.15467	8.51654	7.59678	7.65214
	Glyma.07G245800	PF00561	Abhydrolase_1	GO:0003824	catalytic activity	0.0492967	0	0.0219697	0	0	0
	Glyma.07G242800			GO:0003676	nucleic acid binding	0	0	0	0	0	0
	Glyma.07G247600	PF01249	Ribosomal_S21e	GO:0003735	structural constituent of ribosome	0	0	0	0	0	0
	Glyma.07G245300	PF01095	Pectinesterase	GO:0004857	enzyme inhibitor activity	0	0	0	0	0	0
	Glyma.07G243200	PF04833	COBRA	GO:0004553	hydrolase activity, hydrolyzing O-glycosyl compounds	6.13549	5.71393	4.6016	5.50025	3.40538	2.61168
	Glyma.07G244500	PF01764	Lipase_3	GO:0004806	triglyceride lipase activity	0	0	0	0	0	0
	Glyma.07G243100					26.7655	28.918	32.74	19.3327	26.4192	27.6314
	Glyma.07G246000	PF00364	Biotin_lipoyl	GO:0008152	metabolic process	6.76103	7.06655	6.17465	6.74722	7.8469	6.56241
	Glyma.07G247500	PF05498	RALF			42.5869	29.777	33.8113	43.6128	34.1206	33.3133
	Glyma.07G246900	PF02902	Peptidase_C48	GO:0006508	proteolysis	8.13298	8.24275	10.2223	8.26643	9.6008	11.0104
	Glyma.07G246100	PF01554	MatE	GO:0006855	drug transmembrane transport	0	0	0	0.018581	0	0
	Glyma.07G242700	PF14309	DUF4378			0.810247	0.260395	0.515947	0.995406	0.426713	0.599309
	Glyma.07G247800			GO:0005515	protein binding	0	0.0307593	0	0	0.0197953	0.020467
	Glyma.07G244300	PF08144	CPL	GO:0003723	RNA binding	14.3284	10.8111	12.5203	14.7872	12.4083	13.3824
	Glyma.07G244800					5.18704	6.33044	5.22258	4.18721	6.91404	5.10672
	Glyma.07G247700					0	0	0	0	0	0
	Glyma.07G245900	PF01557	FAA_hydrolase	GO:0003824	catalytic activity	25.721	33.3243	29.4518	32.6558	39.6267	28.9922
	Glyma.07G244600					71.4795	40.2415	29.1065	63.7459	43.2197	34.4643
	Glyma.07G247400	PF09011	DUF1898	GO:0003677	DNA binding	0	0	0	0	0	0
	Glyma.07G244200	PF12708	Pectate_lyase_3	GO:0004650	polygalacturonase activity	4.77686	3.95653	2.13876	5.29451	4.11131	1.34772
	Glyma.07G246300	PF00725	3HCDH	GO:0003824	catalytic activity	50.6944	83.0825	64.4613	49.1383	74.8749	64.8841
	Glyma.07G245200					0.090086	0	0	0.579287	0.0754437	0.0318127
	Glyma.07G243700					168.233	396.824	842.786	115.475	330.228	432.87
	Glyma.07G244400	PF00226	DnaJ	GO:0006457	protein folding	0.324977	0.228475	0.100101	0.151846	0.0902073	0.271129
	Glyma.07G244100	PF00400	WD40	GO:0005515	protein binding	9.53829	8.51394	10.3356	10.2673	8.41411	10.5187
	Glyma.07G243300	PF00249	Myb_DNA-binding	GO:0000156	phosphorelay response regulator activity	15.6078	14.2879	12.3765	16.3767	12.6406	11.5682
	Glyma.07G246400	PF00725	3HCDH	GO:0003857	3-hydroxyacyl-CoA dehydrogenase activity	1.77796	2.56096	2.372	0.86247	1.30812	1.54655
	Glyma.07G246200	PF04570	DUF581			0.0951973	0.0909803	0	0.363406	0.420733	0.0873297
	Glyma.07G244700	PF00481	PP2C	GO:0003824	catalytic activity	2.58055	5.54136	1.86224	3.11131	3.39014	2.53471
	Glyma.07G245600			GO:0008152	metabolic process	0	0.00938667	0.0216597	0.0262213	0.0561397	0.075006
	Glyma.07G247000	PF00646	F-box	GO:0005515	protein binding	0.00792667	0.217561	0.279934	0.05929	0.05068	0.0914037
	Glyma.07G243400	PF05623	DUF789			7.62347	8.40114	8.92765	6.63242	8.74206	7.48535
	Glyma.07G246700					10.3775	6.13096	4.99938	9.56718	6.35537	2.95997
	Glyma.07G242600	PF00249	Myb_DNA-binding	GO:0003677	DNA binding	0	0	0	0	0	0
	Glyma.07G246600	PF01073	3Beta_HSD	GO:0003824	catalytic activity	0.088768	0.0671237	0.0113653	0.190568	0.0618353	0.0814533
	Glyma.07G246800	PF00225	Kinesin	GO:0003777	microtubule motor activity	28.1329	22.5904	21.5126	28.3601	24.0925	22.5851
	Glyma.07G246500					8.80602	4.51957	4.15204	10.5616	4.11878	4.91265
qRGR-12-1	Glyma.12G141700			GO:0005634	nucleus	0.728319	2.0499	1.39015	0.663634	2.42009	0.944411
	Glyma.12G141800	PF00485	PRK	GO:0005524	ATP binding	0	0	0	0	0	0
	Glyma.12G141900	PF03358	FMN_red	GO:0010181	FMN binding	1.59542	359.083	379.902	2.31261	377.977	257.902
	Glyma.12G142000					0	0	0	0	0	0
	Glyma.12G142100	PF07714	Pkinase_Tyr	GO:0004672	protein kinase activity	3.18287	1.36236	1.90612	3.69936	1.34453	2.7948
	Glyma.12G142200	PF07714	Pkinase_Tyr	GO:0004672	protein kinase activity	2.88605	0.993613	1.32448	3.01163	0.766802	1.43596
	Glyma.12G142300	PF07714	Pkinase_Tyr	GO:0004672	protein kinase activity	1.0961	0.128495	0.293535	0.692669	0.091999	0.209136
	Glyma.12G142400	PF07714	Pkinase_Tyr	GO:0004672	protein kinase activity	4.05552	1.79356	3.02665	4.93296	2.05119	3.78019
qRSFW-14-1	Glyma.14G105300	PF00330	Aconitase	GO:0008152	metabolic process	0	0	0	0	0	0
	Glyma.14G105400	PF00072	Response_reg	GO:0000155	phosphorelay sensor kinase activity	9.03928	13.9801	7.19073	9.26309	13.1189	5.76151
	Glyma.14G105500			GO:0008270	zinc ion binding	9.29373	8.14253	10.6715	6.04786	8.23664	11.794
	Glyma.14G105600	PF13456	RVT_3	GO:0003676	nucleic acid binding	0	0	0	0	0	0
	Glyma.14G105700	PF01753	zf-MYND	GO:0004221		3.95149	3.85425	4.40001	4.81328	4.12025	3.86973
	Glyma.14G105800	PF00646	F-box	GO:0005515	protein binding	1.32605	1.34058	1.4538	1.97054	1.09413	1.49467
	Glyma.14G105900	PF13639	zf-RING_2	GO:0005515	protein binding	26.2243	49.9644	33.4064	21.1369	39.8193	25.0814
	Glyma.14G106000	PF13532	2OG-FeII_Oxy_2	GO:0016491	oxidoreductase activity	8.18439	7.24761	8.17849	8.84884	8.52478	9.01882
	Glyma.14G106100					0	0	0	0	0	0
	Glyma.14G106200	PF00847	AP2	GO:0003677	DNA binding	0	0	0	0	0	0
	Glyma.14G106300					0	0	0	0	0	0
	Glyma.14G106400	PF13855	LRR_8	GO:0005515	protein binding	0	0	0	0.003452	0.00595167	0.0681087
	Glyma.14G106500	PF08590	DUF1771			49.1743	60.104	49.2004	48.7734	53.1831	49.8846
qRGR-15-1	Glyma.15G043900	PF08240	ADH_N	GO:0008270	zinc ion binding	0.779891	0.505288	0.91507	0.290905	0.263403	0.286629
	Glyma.15G041400	PF07795	DUF1635			0.0363543	0.0506067	0.293391	0.233178	0.0978783	0.113155
	Glyma.15G042900	PF07714	Pkinase_Tyr	GO:0004672	protein kinase activity	6.92895	5.1094	5.54231	7.35268	4.7178	5.27845
	Glyma.15G041600	PF00925	GTP_cyclohydro2	GO:0003935	GTP cyclohydrolase II activity	0	0	0	0	0	0
	Glyma.15G041800	PF01535	PPR	GO:0005488	binding	0.360742	0.283319	0.381018	0.410059	0.433317	0.42813
	Glyma.15G042200	PF00403	HMA	GO:0030001	metal ion transport	1.05639	0.167231	0.161453	1.16917	0.782328	0.0212453
	Glyma.15G044200					12.8242	7.1021	6.65597	13.8636	8.71363	10.4177
	Glyma.15G044000					1.80525	1.44921	2.61522	0.84359	1.01521	1.6843
	Glyma.15G041200	PF00230	MIP	GO:0005215	transporter activity	0	0	0	0	0	0
	Glyma.15G040800	PF02453	Reticulon	GO:0005783	endoplasmic reticulum	0	0	0	0.0303617	0	0
	Glyma.15G043300	PF00704	Glyco_hydro_18	GO:0003824	catalytic activity	5.43761	1.2459	1.25594	5.5473	2.03357	2.08458
	Glyma.15G042300	PF00831	Ribosomal_L29	GO:0003735	structural constituent of ribosome	52.8369	25.1514	30.1634	36.3486	20.6494	23.7144
	Glyma.15G043600	PF07714	Pkinase_Tyr	GO:0000155	phosphorelay sensor kinase activity	0.3313	1.65373	2.22779	0.391385	2.41549	1.70337
	Glyma.15G043000					0	0	0.137833	0.210234	0	0.14098
	Glyma.15G040400	PF00125	Histone	GO:0000786	nucleosome	138.111	56.4214	78.0099	120.701	63.807	64.5939
	Glyma.15G044400	PF00847	AP2	GO:0003677	DNA binding	85.6466	98.227	69.0131	83.0031	83.4775	56.9878
	Glyma.15G043100					0	0	0	0	0	0
	Glyma.15G042500	PF08392	FAE1_CUT1_RppA	GO:0003824	catalytic activity	0.513055	0.462885	0.383497	0.839252	0.62443	0.340856
	Glyma.15G039900					0.0334317	0.066218	0.00907933	0.120799	0.0263383	0.006514
	Glyma.15G041100	PF00249	Myb_DNA-binding	GO:0003677	DNA binding	5.97298	8.20416	6.40157	12.743	12.5049	14.5528
	Glyma.15G044100					4.84705	3.54947	7.07839	3.08834	5.83703	7.51321
	Glyma.15G040100	PF01842	ACT	GO:0008152	metabolic process	4.08718	6.17588	4.17742	5.22847	6.01821	4.96355
	Glyma.15G043200	PF15511	CENP-T_C	GO:0000786	nucleosome	173.094	61.6423	100.61	160.283	62.0913	95.9007
	Glyma.15G043400	PF00225	Kinesin	GO:0003777	microtubule motor activity	13.1657	6.76527	9.34427	12.112	7.08163	9.02978
	Glyma.15G044500	PF00076	RRM_1	GO:0000166	nucleotide binding	14.7646	15.15	16.7711	15.2195	16.4729	18.6821
	Glyma.15G042700	PF04153	NOT2_3_5	GO:0005634	nucleus	13.0373	11.8351	13.0923	13.4071	12.8635	14.7025
	Glyma.15G040200	PF00125	Histone	GO:0000786	nucleosome	218.511	93.7262	119.462	196.718	99.4526	112.225
	Glyma.15G040000	PF01073	3Beta_HSD	GO:0003824	catalytic activity	40.7824	25.5411	17.8965	41.465	24.233	16.4586
	Glyma.15G042800					3.15664	3.05331	4.02166	3.86403	3.318	3.08896
	Glyma.15G043700	PF02434	Fringe	GO:0016020	membrane	0	0	0	0	0	0
	Glyma.15G044300	PF13481	AAA_25	GO:0000166	nucleotide binding	1.50069	1.0202	0.841111	1.71612	1.11425	1.20827
	Glyma.15G041900					0.0337747	0.169704	0.031178	0.030803	0	0
	Glyma.15G040300	PF00125	Histone	GO:0000786	nucleosome	119.383	40.3797	66.4277	108.306	55.1814	65.7459
	Glyma.15G040500	PF00076	RRM_1	GO:0000166	nucleotide binding	3.98093	4.47605	4.50014	2.92614	3.69946	3.41342
	Glyma.15G043500			GO:0031011	Ino80 complex	7.27607	6.82586	7.46723	7.73527	6.75242	8.17492
	Glyma.15G041700	PF08449	UAA	GO:0055085	transmembrane transport	2.82273	2.82846	2.56877	2.23039	3.31758	2.24322
	Glyma.15G043800	PF07714	Pkinase_Tyr	GO:0004672	protein kinase activity	1.74012	4.76049	3.46944	2.25569	3.67945	3.28644
	Glyma.15G042000			GO:0003677	DNA binding	14.3728	15.8893	16.7082	15.3621	15.9576	18.0212
	Glyma.15G041000					0.0808383	0	0	0	0	0
	Glyma.15G040600	PF00025	Arf	GO:0003924	GTPase activity	14.5925	14.7282	13.9576	12.5873	18.2591	13.7205
	Glyma.15G042100	PF00190	Cupin_1	GO:0045735	nutrient reservoir activity	19.0239	14.9558	27.682	18.0448	13.1185	27.1111
	Glyma.15G041300					272.237	316.874	451.538	213.752	273.247	287.886
	Glyma.15G041500	PF03939	Ribosomal_L23eN	GO:0000166	nucleotide binding	101.989	80.1096	82.7205	106.228	82.4771	83.6935
	Glyma.15G040700	PF13912	zf-C2H2_6	GO:0003676	nucleic acid binding	0.195184	1.07625	0.691833	0.139484	0.856785	1.39031
	Glyma.15G040900			GO:0046983	protein dimerization activity	1.40016	0.902131	0.670702	0	0.822438	0.822572
	Glyma.15G042400	PF03081	Exo70	GO:0000145	exocyst	3.41445	0.890218	0.750196	2.97754	0.726082	0.632842
	Glyma.15G042600	PF12796	Ank_2	GO:0005515	protein binding	0.0330513	0.124339	0.074007	0.089617	0.147955	0.069359
qRGI-17-1/ qRGP-17-1	Glyma.17G219200	PF07714	Pkinase_Tyr	GO:0004672	protein kinase activity	4.68452	20.1366	13.1568	5.60543	22.3603	11.2594
	Glyma.17G219100					0	0	0	0	0	0
	Glyma.17G218200	PF00171	Aldedh	GO:0008152	metabolic process	5.65804	3.61954	5.24369	2.82656	2.00404	4.63638
	Glyma.17G219400	PF04145	Ctr	GO:0005375	copper ion transmembrane transporter activity	1.53319	1.27079	1.8985	2.38316	1.89406	1.55529
	Glyma.17G219900	PF13041	PPR_2	GO:0005488	binding	4.71374	3.20179	5.12177	4.53767	3.74852	6.40318
	Glyma.17G219700	PF00847	AP2	GO:0003677	DNA binding	0	0	0	0	0	0
	Glyma.17G220000	PF00183	HSP90	GO:0005524	ATP binding	0.370781	0.199459	0.272923	0.235601	0.157518	0.280801
	Glyma.17G219600	PF08590	DUF1771			62.7521	62.4822	59.8052	54.9849	53.1316	54.7807
	Glyma.17G218500	PF00069	Pkinase	GO:0004672	protein kinase activity	46.9764	30.04	37.7199	43.7073	38.0903	39.3843
	Glyma.17G220200	PF07082	DUF1350	GO:0009405	pathogenesis	1.09623	0.794698	0.91402	0.954736	0.323913	0.71176
	Glyma.17G218300	PF02148	zf-UBP	GO:0004221		9.65808	8.93652	8.9739	8.06605	8.15694	9.46861
	Glyma.17G218600	PF00091	Tubulin	GO:0003924	GTPase activity	0	0	0.115196	0	0	0
	Glyma.17G219800					10.3588	7.59352	10.1338	11.4956	11.8772	15.8827
	Glyma.17G219300	PF05462	Dicty_CAR	GO:0004888	transmembrane signaling receptor activity	10.3642	10.911	11.2694	12.3325	11.1549	11.7609
	Glyma.17G219500	PF07911	DUF1677			31.2045	24.0915	30.3052	27.1248	24.9137	25.1767
	Glyma.17G219000					1.80487	1.62184	1.42196	2.10813	1.32149	0.967186
	Glyma.17G218400	PF07690	MFS_1	GO:0016021	integral component of membrane	8.61918	8.49716	8.78644	9.37324	8.12753	7.62386
	Glyma.17G218700	PF00481	PP2C	GO:0003824	catalytic activity	25.9781	19.1889	21.6831	22.6287	14.9842	20.1419
	Glyma.17G218800	PF00160	Pro_isomerase	GO:0000413	protein peptidyl-prolyl isomerization	16.8544	16.014	20.1597	15.39	15.0737	22.5087
	Glyma.17G218900	PF07714	Pkinase_Tyr	GO:0004672	protein kinase activity	0	0	0	0	0	0
	Glyma.17G220100	PF01535	PPR	GO:0005488	binding	0.851238	0.753815	0.711199	26.0857	28.0275	38.5885
qRGI-19-1	Glyma.19G085000	PF14227	UBN2_2			0	0	0	0	0	0
	Glyma.19G085100	PF13964	Kelch_6	GO:0005515	protein binding	8.43619	12.6277	7.38785	3.37036	13.4244	11.2726
	Glyma.19G085200	PF00026	Asp	GO:0004190	aspartic-type endopeptidase activity	0.00971033	0.56503	0.276704	0.168595	0.614372	0.887746
	Glyma.19G085300	PF01281	Ribosomal_L9_N	GO:0003735	structural constituent of ribosome	7.67135	6.34729	6.1983	5.7621	6.40102	5.15718
	Glyma.19G085400					0	0	0	0	0	0
	Glyma.19G085500			GO:0003677	DNA binding	4.41863	2.13648	2.99747	3.16596	2.90335	2.5095
	Glyma.19G085600	PF00931	NB-ARC	GO:0005524	ATP binding	1.60155	1.27009	1.88139	1.61905	1.27881	1.97927
	Glyma.19G085700	PF00249	Myb_DNA-binding	GO:0003677	DNA binding	0.0186957	0.062982	0.162844	0	0	0.37135
	Glyma.19G085800					0.0202177	0	0	0	0	0.141145
	Glyma.19G085900	PF00931	NB-ARC	GO:0005524	ATP binding	0.0677923	0.135051	0.030555	0.0404727	0.0251257	0.0165907
	Glyma.19G086000	PF07883	Cupin_2	GO:0030145	manganese ion binding	0.0558603	0.421391	0.210399	0.429674	0.242692	0
	Glyma.19G086100	PF07883	Cupin_2	GO:0030145	manganese ion binding	11.6038	6.72427	5.42294	8.55531	9.29117	7.35143
	Glyma.19G086200	PF07883	Cupin_2	GO:0030145	manganese ion binding	5.55672	2.52844	1.06573	4.6642	3.77549	0.983108
	Glyma.19G086300	PF00400	WD40	GO:0005515	protein binding	0	0	0	0	0.00676633	0
	Glyma.19G086400	PF07883	Cupin_2	GO:0030145	manganese ion binding	9.91177	5.84399	5.05366	7.32395	7.8813	7.01554
	Glyma.19G086500	PF07883	Cupin_2	GO:0030145	manganese ion binding	0.226127	0.136268	0.0663187	0.045909	0.068542	0.027193
	Glyma.19G086600			GO:0005488	binding	11.9456	12.1304	8.21072	12.6293	12.375	7.81588

## Sheet: Supplementary Table 8
Supplementary Table 8. The candidate genes identified by integration of GWAS and RNA-seq
Gene ID	Gene annotation	Description
Glyma.16G213400	Peptidoglycan-binding LysM domain-containing protein	both in DT-12，DT-24 VS DT-0，and DS-12，DS-24 VS DS-0，
Glyma.16G210300	p450
Glyma.16G210500	LRRNT_2
Glyma.16G214100	NB-ARC
Glyma.17G219200	Pkinase_Tyr
Glyma.12G141700	basic helix-loop-helix (bHLH) DNA-binding superfamily protein
Glyma.12G141900	flavodoxin-like quinone reductase 1
Glyma.15G042400	Exo70
Glyma.15G043300	Glyco_hydro_18
Glyma.15G040000	UDP-XYL synthase 5
Glyma.15G043600	Pkinase_Tyr
Glyma.15G043200	CENP-T_C
Glyma.07G242900	importin alpha isoform 1
Glyma.07G247900	tRNA-synt_2c
Glyma.05G046900	Arginosuc_synth
Glyma.05G048400	dCMP_cyt_deam_1
Glyma.05G049300	GRAS family transcription factor
Glyma.05G047900	Metallophos
Glyma.14G105900	zf-RING_2
Glyma.15G041100	Myb_DNA-binding	between DT and DS accessions
Glyma.17G220100	PPR
Glyma.19G085100	Kelch_6
